# Supplementary material for: The mycobiome of root canal infections is correlated to the bacteriome
Source: Springer Nature journal article supplement (doi:10.1007/s00784-016-1980-3), 2016-10-22
Supplement: MOESM1 [file 10957642]

**The mycobiome of root canal infections is correlated to the bacteriome.** *Clinical Oral Investigations*  
 Ilona F. Persoon<sup>1</sup>, Mark J. Buijs<sup>1</sup>, Ahmet R. Özok<sup>2</sup>, Wim Crielaard<sup>1</sup>, Bastiaan P. Krom<sup>1</sup>, Egija Zaura<sup>1</sup>,  
 Bernd W. Brandt<sup>1</sup>

Affiliations:<sup>1</sup>Department of Preventive Dentistry; <sup>2</sup>Department of Endodontology, Academic Centre for  
 Dentistry Amsterdam (ACTA), University of Amsterdam and Vrije Universiteit Amsterdam, The  
 Netherlands

Correspondence: Ilona F. Persoon, i.persoon@acta.nl

**Table** Abundance and prevalence of bacterial genera of root canal infections

| Phylum         | Genus or higher level      | All teeth (N = 23) |            | Apical samples (N = 22) |            | Coronal samples (N = 23) |            |
|----------------|----------------------------|--------------------|------------|-------------------------|------------|--------------------------|------------|
|                |                            | % Abundance        | Prevalence | % Abundance             | Prevalence | % Abundance              | Prevalence |
| Bacteroidetes  | <i>Prevotella</i>          | 12.74              | 23         | 13.08                   | 22         | 12.42                    | 22         |
| Firmicutes     | <i>Lactobacillus</i>       | 11.18              | 21         | 7.41                    | 16         | 14.79                    | 19         |
| Actinobacteria | <i>Actinomyces</i>         | 7.47               | 23         | 4.39                    | 21         | 10.42                    | 23         |
| Fusobacteria   | <i>Fusobacterium</i>       | 7.20               | 23         | 9.33                    | 21         | 5.16                     | 22         |
| Actinobacteria | <i>Atopobium</i>           | 6.94               | 21         | 4.14                    | 19         | 9.61                     | 19         |
| Firmicutes     | <i>Streptococcus</i>       | 4.39               | 23         | 4.62                    | 19         | 4.17                     | 23         |
| Fusobacteria   | <i>Leptotrichia</i>        | 4.32               | 22         | 6.56                    | 18         | 2.17                     | 20         |
| Bacteroidetes  | <i>Phocaeicola</i>         | 3.45               | 14         | 3.65                    | 12         | 3.26                     | 14         |
| Synergistetes  | <i>Pyramidobacter</i>      | 2.85               | 6          | 3.66                    | 4          | 2.07                     | 4          |
| Bacteroidetes  | <i>Porphyromonas</i>       | 2.68               | 19         | 3.21                    | 15         | 2.18                     | 16         |
| Firmicutes     | Clostridiales Family XIII  | 2.50               | 20         | 2.97                    | 18         | 2.05                     | 17         |
| Bacteroidetes  | <i>Alloprevotella</i>      | 2.37               | 17         | 2.21                    | 12         | 2.52                     | 12         |
| TM7            | Phylum TM7                 | 1.92               | 18         | 1.62                    | 13         | 2.21                     | 18         |
| Actinobacteria | <i>Actinobaculum</i>       | 1.72               | 16         | 1.30                    | 13         | 2.12                     | 15         |
| Firmicutes     | <i>Parvimonas</i>          | 1.59               | 22         | 2.24                    | 20         | 0.97                     | 19         |
| Firmicutes     | <i>Dialister</i>           | 1.58               | 21         | 1.88                    | 18         | 1.30                     | 21         |
| Firmicutes     | <i>Pseudoramibacter</i>    | 1.57               | 19         | 1.28                    | 15         | 1.86                     | 17         |
| Actinobacteria | <i>Corynebacterium</i>     | 1.53               | 17         | 1.20                    | 12         | 1.83                     | 12         |
| Firmicutes     | <i>Veillonella</i>         | 1.42               | 21         | 1.64                    | 18         | 1.21                     | 21         |
| Firmicutes     | <i>Peptostreptococcus</i>  | 1.41               | 12         | 1.98                    | 11         | 0.87                     | 12         |
| Actinobacteria | <i>Olsenella</i>           | 1.38               | 21         | 1.39                    | 18         | 1.36                     | 20         |
| Firmicutes     | <i>Fillifactor</i>         | 1.38               | 16         | 1.45                    | 14         | 1.31                     | 14         |
| Firmicutes     | <i>Anaeroglobus</i>        | 1.29               | 16         | 1.81                    | 13         | 0.79                     | 12         |
| Firmicutes     | <i>Selenomonas</i>         | 1.24               | 23         | 1.42                    | 21         | 1.07                     | 20         |
| Actinobacteria | <i>Propionibacterium</i>   | 1.16               | 16         | 1.33                    | 13         | 1.00                     | 16         |
| Spirochaetae   | <i>Treponema</i>           | 1.04               | 19         | 1.41                    | 17         | 0.70                     | 15         |
| Euryarchaeota  | <i>Methanobrevibacter</i>  | 1.02               | 11         | 0.79                    | 8          | 1.23                     | 9          |
| Proteobacteria | <i>Campylobacter</i>       | 0.89               | 20         | 1.35                    | 18         | 0.44                     | 18         |
| Proteobacteria | <i>Lautropia</i>           | 0.83               | 9          | 0.29                    | 7          | 1.35                     | 9          |
| Firmicutes     | <i>Oribacterium</i>        | 0.83               | 20         | 1.24                    | 19         | 0.43                     | 18         |
| Firmicutes     | <i>Mogibacterium</i>       | 0.81               | 20         | 1.23                    | 18         | 0.42                     | 18         |
| Bacteroidetes  | <i>Tannerella</i>          | 0.71               | 19         | 0.96                    | 16         | 0.47                     | 15         |
| Actinobacteria | <i>Rothia</i>              | 0.61               | 20         | 0.21                    | 15         | 1.00                     | 17         |
| Synergistetes  | Family Synergistaceae      | 0.41               | 18         | 0.48                    | 16         | 0.35                     | 14         |
| Synergistetes  | <i>Fretibacterium</i>      | 0.38               | 16         | 0.40                    | 14         | 0.36                     | 13         |
| Actinobacteria | <i>Scardovia</i>           | 0.38               | 18         | 0.21                    | 12         | 0.54                     | 15         |
| Actinobacteria | <i>Parascardovia</i>       | 0.34               | 14         | 0.43                    | 9          | 0.26                     | 11         |
| Chloroflexi    | Family Anaerolineaceae     | 0.32               | 12         | 0.33                    | 10         | 0.30                     | 10         |
| Bacteroidetes  | <i>Capnocytophaga</i>      | 0.29               | 12         | 0.32                    | 10         | 0.27                     | 9          |
| Firmicutes     | Family Veillonellaceae     | 0.24               | 18         | 0.27                    | 14         | 0.21                     | 15         |
| Bacteroidetes  | RC9 gut group              | 0.22               | 12         | 0.28                    | 10         | 0.17                     | 12         |
| Actinobacteria | <i>Bifidobacterium</i>     | 0.21               | 12         | 0.09                    | 7          | 0.32                     | 10         |
| Firmicutes     | <i>Shuttleworthia</i>      | 0.20               | 16         | 0.25                    | 11         | 0.15                     | 13         |
| Firmicutes     | <i>Lachnoanaerobaculum</i> | 0.19               | 13         | 0.26                    | 12         | 0.13                     | 12         |

|                |                                 |      |    |       |    |       |    |
|----------------|---------------------------------|------|----|-------|----|-------|----|
| Actinobacteria | Family Coriobacteriaceae        | 0.18 | 9  | 0.07  | 6  | 0.29  | 7  |
| Firmicutes     | Family Lachnospiraceae          | 0.14 | 11 | 0.24  | 10 | 0.04  | 10 |
| Proteobacteria | <i>Neisseria</i>                | 0.14 | 13 | 0.07  | 10 | 0.21  | 12 |
| Actinobacteria | <i>Slackia</i>                  | 0.14 | 19 | 0.14  | 15 | 0.14  | 16 |
| Firmicutes     | <i>Howardella</i>               | 0.13 | 10 | 0.23  | 6  | 0.04  | 6  |
| Proteobacteria | <i>Haemophilus</i>              | 0.12 | 12 | 0.12  | 7  | 0.11  | 9  |
| Actinobacteria | Family Corynebacteriaceae       | 0.11 | 2  | 0.21  | 1  | 0.01  | 2  |
| Firmicutes     | <i>Johnsonella</i>              | 0.11 | 15 | 0.13  | 11 | 0.08  | 13 |
| Firmicutes     | <i>Solobacterium</i>            | 0.10 | 18 | 0.12  | 15 | 0.08  | 8  |
| Firmicutes     | Lactobacillales family P5D1-392 | 0.10 | 15 | 0.09  | 8  | 0.11  | 11 |
| Proteobacteria | <i>Aggregatibacter</i>          | 0.09 | 9  | 0.13  | 6  | 0.06  | 6  |
| Proteobacteria | <i>Desulfobulbus</i>            | 0.09 | 13 | 0.08  | 11 | 0.09  | 11 |
| Firmicutes     | <i>Catonella</i>                | 0.07 | 10 | 0.06  | 8  | 0.07  | 7  |
| Proteobacteria | <i>Cardiobacterium</i>          | 0.06 | 6  | 0.07  | 5  | 0.04  | 6  |
| Bacteroidetes  | <i>Proteiniphilum</i>           | 0.06 | 2  | 0.11  | 2  | 0.01  | 2  |
| Firmicutes     | <i>Abiotrophia</i>              | 0.05 | 7  | 0.03  | 6  | 0.07  | 5  |
| Bacteroidetes  | Family Prevotellaceae           | 0.05 | 9  | 0.02  | 6  | 0.09  | 7  |
| Firmicutes     | <i>Gemella</i>                  | 0.05 | 11 | 0.07  | 10 | 0.03  | 9  |
| Firmicutes     | <i>Peptococcus</i>              | 0.05 | 10 | 0.07  | 7  | 0.03  | 9  |
| Actinobacteria | <i>Cryptobacterium</i>          | 0.05 | 11 | 0.06  | 9  | 0.03  | 8  |
| Firmicutes     | <i>Fastidiosipila</i>           | 0.04 | 2  | 0.08  | 2  | 0.01  | 2  |
| Bacteroidetes  | Family WCHB1-69                 | 0.04 | 8  | 0.06  | 6  | 0.02  | 7  |
| Firmicutes     | <i>Stomatobaculum</i>           | 0.04 | 12 | 0.04  | 9  | 0.04  | 5  |
| Firmicutes     | Family Erysipelotrichaceae      | 0.04 | 8  | 0.04  | 5  | 0.03  | 7  |
| TM7            | Candidatus Saccharimonas        | 0.04 | 9  | 0.06  | 8  | 0.01  | 5  |
| Bacteroidetes  | <i>Paludibacter</i>             | 0.03 | 10 | 0.04  | 6  | 0.03  | 8  |
| Bacteroidetes  | <i>Bacteroides</i>              | 0.03 | 5  | 0.06  | 3  | 0.01  | 4  |
| Tenericutes    | <i>Mycoplasma</i>               | 0.03 | 5  | 0.04  | 5  | 0.03  | 1  |
| Firmicutes     | <i>Bulleidia</i>                | 0.03 | 5  | 0.05  | 4  | 0.02  | 3  |
| Firmicutes     | Family Defluviitaleaceae        | 0.03 | 6  | 0.06  | 6  | 0.01  | 4  |
| Proteobacteria | <i>Pelomonas</i>                | 0.03 | 9  | 0.05  | 8  | 0.01  | 3  |
| Bacteroidetes  | Bacteroidales family S24-7      | 0.03 | 1  | 0.05  | 1  | 0.01  | 1  |
| Bacteroidetes  | <i>Odoribacter</i>              | 0.03 | 2  | 0.06  | 2  | <0.01 | 2  |
| Actinobacteria | <i>Aeriscardovia</i>            | 0.03 | 4  | 0.01  | 2  | 0.04  | 4  |
| Actinobacteria | <i>Enterorhabdus</i>            | 0.03 | 9  | 0.02  | 6  | 0.03  | 8  |
| Actinobacteria | Phylum Actinobacteria           | 0.03 | 4  | 0.02  | 2  | 0.03  | 4  |
| Firmicutes     | Clostridiales Family XI         | 0.02 | 4  | <0.01 | 1  | 0.05  | 3  |
| Fusobacteria   | Family Leptotrichiaceae         | 0.02 | 5  | 0.03  | 3  | 0.02  | 4  |
| Firmicutes     | <i>Eggerthia</i>                | 0.02 | 5  | 0.03  | 4  | 0.01  | 4  |
| Firmicutes     | Family Peptostreptococcaceae    | 0.02 | 7  | 0.03  | 7  | <0.01 | 2  |
| Proteobacteria | <i>Pseudomonas</i>              | 0.02 | 6  | 0.02  | 3  | 0.01  | 5  |
| Proteobacteria | <i>Bradyrhizobium</i>           | 0.02 | 8  | 0.02  | 6  | 0.01  | 5  |
| Firmicutes     | <i>Megasphaera</i>              | 0.02 | 9  | 0.02  | 6  | 0.01  | 6  |
| Firmicutes     | Family Ruminococcaceae          | 0.02 | 7  | 0.03  | 6  | <0.01 | 2  |
| Bacteroidetes  | <i>Flavobacterium</i>           | 0.02 | 1  | 0.03  | 1  |       |    |
| Proteobacteria | <i>Kingella</i>                 | 0.02 | 8  | 0.02  | 5  | 0.01  | 5  |
| Firmicutes     | <i>Pediococcus</i>              | 0.01 | 3  | 0.01  | 1  | 0.02  | 3  |
| Bacteroidetes  | <i>Bergeyella</i>               | 0.01 | 5  | 0.02  | 5  | 0.01  | 2  |
| Proteobacteria | <i>Eikenella</i>                | 0.01 | 8  | 0.02  | 6  | <0.01 | 3  |
| Proteobacteria | <i>Methylobacterium</i>         | 0.01 | 6  | 0.02  | 5  | <0.01 | 1  |
| Proteobacteria | <i>Sphingomonas</i>             | 0.01 | 7  | 0.01  | 5  | 0.01  | 3  |
| Proteobacteria | <i>Comamonas</i>                | 0.01 | 3  | 0.02  | 3  | <0.01 | 1  |
| Firmicutes     | Family Bacillaceae              | 0.01 | 6  | 0.01  | 5  | <0.01 | 3  |
| Proteobacteria | <i>Tepidimonas</i>              | 0.01 | 6  | <0.01 | 3  | 0.01  | 3  |
| Proteobacteria | <i>Paracoccus</i>               | 0.01 | 2  | 0.01  | 1  | <0.01 | 1  |
| Firmicutes     | <i>Coprococcus</i>              | 0.01 | 3  | 0.01  | 3  | <0.01 | 2  |
| Tenericutes    | <i>Acholeplasma</i>             | 0.01 | 3  | 0.01  | 3  | <0.01 | 1  |

|                |                               |       |   |       |   |       |   |
|----------------|-------------------------------|-------|---|-------|---|-------|---|
| Firmicutes     | Clostridiales vadinBB60 group | 0.01  | 4 | 0.01  | 3 | 0.01  | 4 |
| Bacteroidetes  | <i>Sediminibacterium</i>      | 0.01  | 3 | 0.01  | 3 |       |   |
| Firmicutes     | <i>Butyrivibrio</i>           | 0.01  | 2 | 0.01  | 2 | <0.01 | 2 |
| Spirochaetae   | <i>Spirochaeta</i>            | 0.01  | 3 | 0.01  | 3 | <0.01 | 2 |
| Proteobacteria | <i>Burkholderia</i>           | <0.01 | 3 | <0.01 | 1 | 0.01  | 3 |
| Proteobacteria | <i>Caulobacter</i>            | <0.01 | 4 | <0.01 | 2 | 0.01  | 2 |
| SR1            | Phylum SR1                    | <0.01 | 5 | 0.01  | 4 | <0.01 | 2 |
| Proteobacteria | <i>Acinetobacter</i>          | <0.01 | 2 | 0.01  | 1 | <0.01 | 1 |
| Proteobacteria | Family Pasteurellaceae        | <0.01 | 5 | <0.01 | 4 | <0.01 | 2 |
| Tenericutes    | Order NB1-n                   | <0.01 | 3 | 0.01  | 3 | <0.01 | 1 |
| Firmicutes     | <i>Christensenella</i>        | <0.01 | 1 | 0.01  | 1 |       |   |
| Proteobacteria | <i>Sphingobium</i>            | <0.01 | 2 | <0.01 | 2 |       |   |
| Proteobacteria | <i>Massilia</i>               | <0.01 | 1 | <0.01 | 1 |       |   |
| Bacteroidetes  | <i>Pedobacter</i>             | <0.01 | 1 | <0.01 | 1 |       |   |
| Actinobacteria | <i>Nitriiruptor</i>           | <0.01 | 4 | <0.01 | 3 | <0.01 | 2 |
| Proteobacteria | <i>Novosphingobium</i>        | <0.01 | 2 | <0.01 | 2 | <0.01 | 1 |
| Actinobacteria | <i>Jatrophihabitans</i>       | <0.01 | 2 | <0.01 | 1 | <0.01 | 1 |
| Proteobacteria | <i>Klebsiella</i>             | <0.01 | 2 | <0.01 | 2 |       |   |
| Proteobacteria | <i>Propionivibrio</i>         | <0.01 | 2 |       |   | <0.01 | 2 |
| Proteobacteria | Family Phyllobacteriaceae     | <0.01 | 2 | <0.01 | 2 |       |   |
| Bacteroidetes  | <i>Cytophaga</i>              | <0.01 | 1 | <0.01 | 1 |       |   |
| Proteobacteria | Family Solimonadaceae         | <0.01 | 1 | <0.01 | 1 |       |   |
| Bacteroidetes  | Phylum Bacteroidetes          | <0.01 | 1 |       |   | <0.01 | 1 |
| Proteobacteria | <i>Sorangium</i>              | <0.01 | 1 | <0.01 | 1 |       |   |
| Proteobacteria | <i>Curvibacter</i>            | <0.01 | 3 | <0.01 | 2 | <0.01 | 1 |
| Proteobacteria | <i>Aquabacterium</i>          | <0.01 | 2 | <0.01 | 2 | <0.01 | 1 |
| Proteobacteria | <i>Serratia</i>               | <0.01 | 2 | <0.01 | 2 |       |   |
| Proteobacteria | <i>Camelimonas</i>            | <0.01 | 1 | <0.01 | 1 |       |   |
| Cyanobacteria  | <i>Chroococcidiopsis</i>      | <0.01 | 1 | <0.01 | 1 |       |   |
| Firmicutes     | <i>Dolosigranulum</i>         | <0.01 | 1 | <0.01 | 1 |       |   |
| Bacteroidetes  | Family p-2534-18B5 gut group  | <0.01 | 1 | <0.01 | 1 |       |   |
| Firmicutes     | <i>Pelospora</i>              | <0.01 | 1 | <0.01 | 1 |       |   |
| Proteobacteria | Family Caulobacteraceae       | <0.01 | 2 | <0.01 | 2 |       |   |
| Bacteroidetes  | <i>Chryseobacterium</i>       | <0.01 | 1 | <0.01 | 1 |       |   |
| Proteobacteria | <i>Desulfomicrobium</i>       | <0.01 | 1 |       |   | <0.01 | 1 |
| Firmicutes     | <i>Lactococcus</i>            | <0.01 | 1 | <0.01 | 1 |       |   |
| Actinobacteria | Family Propionibacteriaceae   | <0.01 | 2 |       |   | <0.01 | 2 |
| Proteobacteria | <i>Alkanibacter</i>           | <0.01 | 1 | <0.01 | 1 |       |   |
| Proteobacteria | Family GR-WP33-58             | <0.01 | 1 | <0.01 | 1 |       |   |
| Proteobacteria | <i>Xylella</i>                | <0.01 | 1 | <0.01 | 1 |       |   |
| Proteobacteria | <i>Brevundimonas</i>          | <0.01 | 1 | <0.01 | 1 |       |   |
| Proteobacteria | Family Enterobacteriaceae     | <0.01 | 1 |       |   | <0.01 | 1 |
| Proteobacteria | <i>Halomonas</i>              | <0.01 | 1 | <0.01 | 1 |       |   |
| Actinobacteria | <i>Micrococcus</i>            | <0.01 | 1 |       |   | <0.01 | 1 |
| Firmicutes     | <i>Staphylococcus</i>         | <0.01 | 1 |       |   | <0.01 | 1 |
| Proteobacteria | <i>Stenotrophomonas</i>       | <0.01 | 1 | <0.01 | 1 |       |   |
