# Supplementary material for: The mycobiome of root canal infections is correlated to the bacteriome
Source: Springer Nature journal article supplement (doi:10.1007/s00784-016-1980-3), 2016-10-22
Supplement: MOESM2 [file 10957642]

**The mycobiome of root canal infections is correlated to the bacteriome.** *Clinical Oral Investigations*  
 Ilona F. Persoon<sup>1</sup>, Mark J. Buijs<sup>1</sup>, Ahmet R. Özok<sup>2</sup>, Wim Crielaard<sup>1</sup>, Bastiaan P. Krom<sup>1</sup>, Egija Zaura<sup>1</sup>,  
 Bernd W. Brandt<sup>1</sup>

Affiliations:<sup>1</sup>Department of Preventive Dentistry; <sup>2</sup>Department of Endodontology, Academic Centre for  
 Dentistry Amsterdam (ACTA), University of Amsterdam and Vrije Universiteit Amsterdam, The  
 Netherlands

Correspondence: Ilona F. Persoon, i.persoon@acta.nl

## Results of ITS2 sequencing

In the ITS2 analysis, 482 693 reads passed quality filtering and processing, with  $40\,173 \pm 12\,335$  reads per sample (range 4831 – 56 874). Samples were normalized by subsampling at a depth of 4800 reads, after which 23 OTUs remained (Table ESM 2). Apical root segments contained  $3 \pm 2$  OTUs (range 1 – 5), while coronal root segments contained  $5 \pm 4$  OTUs (range 1 - 11). Coronal root segments did not contain more OTUs ( $z = -0.213$ ,  $p = 0.832$ ; Fig. ESM 2.1a) and were not more diverse ( $z = -0.314$ ,  $p = 0.753$ ; Fig. ESM 2.1b) than apical segments. Analysis of Bray-Curtis similarity indices revealed no distinct grouping ( $H(2) = 4.054$ ,  $p = 0.132$ ; Fig. ESM 2.1c). In the PCA, coronal and apical root segments were not significantly different either (PERMANOVA,  $F = 0.222$ ,  $p = 0.987$ ; Fig. ESM 2.2).

**Table ESM 2** Abundance and prevalence of fungal OTUs of root canal infections, as determined through sequencing of the ITS2 region

| Phylum        | Species or higher level              | All teeth (N = 6) |            | Apical samples (N = 6) |            | Coronal samples (N = 6) |            |
|---------------|--------------------------------------|-------------------|------------|------------------------|------------|-------------------------|------------|
|               |                                      | % Abundance       | Prevalence | % Abundance            | Prevalence | % Abundance             | Prevalence |
| Ascomycota    | <i>Aspergillus</i>                   | 0.22              | 1          |                        |            | 0.51                    | 1          |
| Ascomycota    | <i>Candida</i> (7 OTUs)              | 80.13             | 6          | 93.69                  | 6          | 96.73                   | 6          |
|               | <i>Candida albicans</i> (3 OTUs)     | 60.95             | 6          | 68.91                  | 6          | 75.91                   | 6          |
|               | <i>Candida dubliniensis</i> (2 OTUs) | 12.75             | 2          | 16.45                  | 2          | 13.85                   | 2          |
|               | <i>Candida glabrata</i>              | 6.43              | 1          | 8.33                   | 1          | 6.96                    | 1          |
|               | <i>Candida zeylanoides</i>           | 0.001             | 1          |                        |            | 0.003                   | 1          |
| Ascomycota    | <i>Citeromyces matritensis</i>       | 0.10              | 1          | 0.23                   | 1          |                         |            |
| Basidiomycota | <i>Cryptococcus neoformans</i>       | 0.11              | 2          | 0.18                   | 1          | 0.08                    | 1          |
| Ascomycota    | <i>Debaryomyces</i>                  | 0.74              | 2          | 0.08                   | 1          | 1.68                    | 2          |
| Ascomycota    | <i>Exophiala oligosperma</i>         | 0.01              | 1          |                        |            | 0.03                    | 1          |
| Ascomycota    | <i>Lecanicillium</i>                 | 0.29              | 1          | 0.68                   | 1          |                         |            |
| Basidiomycota | <i>Malassezia</i> (4 OTUs)           | 2.16              | 3          | 4.83                   | 2          | 0.29                    | 1          |
|               | <i>Malassezia globosa</i> (2 OTUs)   | 1.03              | 3          | 2.44                   | 2          | 0.02                    | 1          |
|               | <i>Malassezia restricta</i>          | 1.05              | 2          | 2.39                   | 1          | 0.11                    | 1          |
|               | <i>Malassezia</i> sp                 | 0.07              | 1          |                        |            | 0.16                    | 1          |
| Ascomycota    | Order Capnodiales                    | 0.001             | 1          |                        |            | 0.003                   | 1          |
| Ascomycota    | <i>Penicillium digitatum</i>         | 0.14              | 2          | 0.12                   | 1          | 0.21                    | 2          |
| Ascomycota    | <i>Phoma saxea</i>                   | 0.09              | 1          |                        |            | 0.21                    | 1          |
| Ascomycota    | Phylum Ascomycota (2 OTUs)           | 0.11              | 1          |                        |            | 0.25                    | 1          |
| Ascomycota    | <i>Pichia fermentans</i>             | 0.01              | 1          | 0.01                   | 1          |                         |            |
| Ascomycota    | <i>Saccharomyces</i>                 | 0.07              | 1          | 0.16                   | 1          |                         |            |

Taxonomy was assigned to the most abundant sequence of the clustered sequences of the OTU, clustered at 97% similarity, using the UNITE database. OTUs grouped together belonging to one genus are depicted in grey

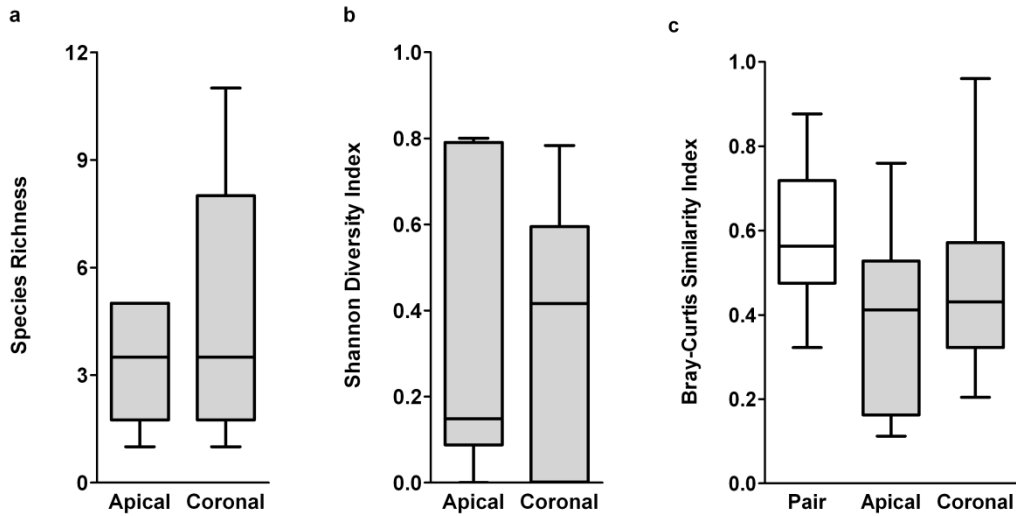

**Fig. ESM 2.1** Diversity analyses of the mycobionemes of root canal infections as determined through sequencing of the ITS2 region. **a** observed species richness (number of OTUs / sample). **b** Shannon diversity index of within-sample diversity. **c** Bray-Curtis similarity index of between-sample diversity. For analysis of the species richness and Shannon diversity index, Wilcoxon signed-rank test compared apical (N = 6) to coronal root segments (N = 6). For analysis of the Bray-Curtis similarity index, the Kruskal-Wallis test compared the paired root samples to the apical and coronal root segments. No significant relations were found

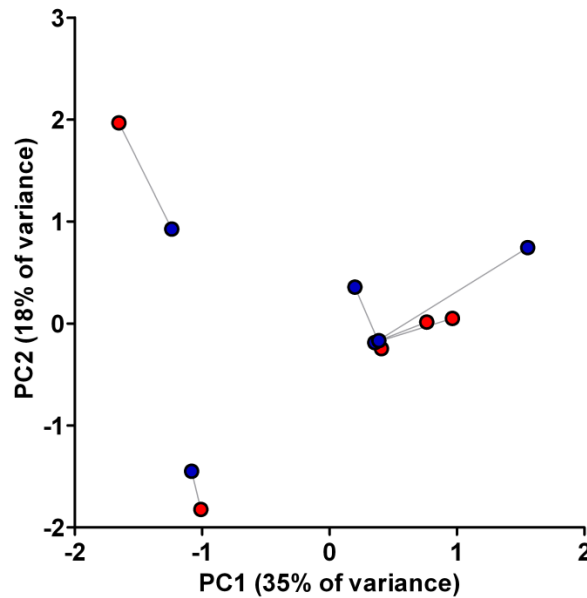

**Fig. ESM 2.2** A two-dimensional ordination by principal component analysis (PCA) of the mycobioneme as determined through ITS2 sequencing. The apical (N = 6; red) and coronal root segments (N = 6; blue) were not statistically significantly different ( $F = 0.222$ ,  $p = 0.987$ , PERMANOVA). Principal components PC1, PC2 and PC3 (not shown) explained 35%, 18% and 17% of the overall variance among samples, respectively. Corresponding apical and coronal root segments are connected with a line
