# Supplementary material for: The mycobiome of root canal infections is correlated to the bacteriome
Source: Springer Nature journal article supplement (doi:10.1007/s00784-016-1980-3), 2016-10-22
Supplement: MOESM3 [file 10957642]

**The mycobiome of root canal infections is correlated to the bacteriome.** *Clinical Oral Investigations*  
Ilona F. Persoon<sup>1</sup>, Mark J. Buijs<sup>1</sup>, Ahmet R. Özok<sup>2</sup>, Wim Crielaard<sup>1</sup>, Bastiaan P. Krom<sup>1</sup>, Egija Zaura<sup>1</sup>,  
Bernd W. Brandt<sup>1</sup>

Affiliations:<sup>1</sup>Department of Preventive Dentistry; <sup>2</sup>Department of Endodontology, Academic Centre for  
Dentistry Amsterdam (ACTA), University of Amsterdam and Vrije Universiteit Amsterdam, The  
Netherlands

Correspondence: Ilona F. Persoon, i.persoon@acta.nl

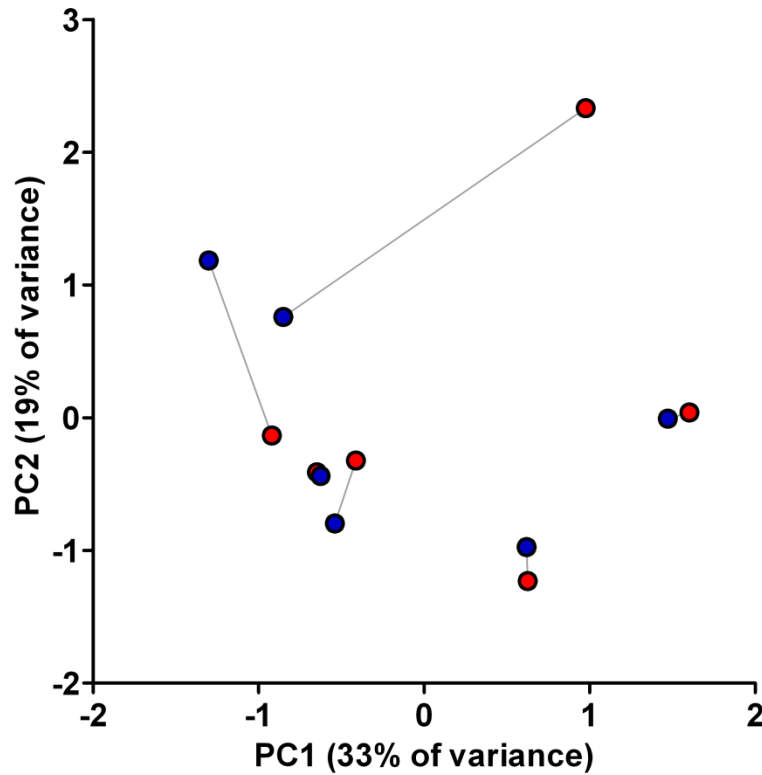

**Fig.** A two-dimensional ordination by principal component analysis (PCA) of the mycobiomes, as determined through ITS1 sequencing, of apical (N = 6; red) and coronal root segments (N = 6; blue) were not statistically significantly different ( $F = 0.327$ ,  $p = 0.966$ , PERMANOVA). Principal components PC1, PC2 and PC3 (not shown) explained 33%, 19% and 13% of the overall variance among samples, respectively. Corresponding apical and coronal root segments are connected with a line
